# Supplementary material for: Workplace environment and burnout among hemodialysis healthcare professionals: a pilot study
Source: Research Square preprint supplement (doi:10.21203/rs.3.rs-8900197/v1), 2026-02-24
Supplement: Supplementary file 1 [file 0a0ed060d803039a441d6b98.docx]

Supplementary material

Table S1. Results of the MBI, MOLBI, BDI, DAS-SFI questionnaires

| **n=39** |  | **n** | **%** |  |  |  | **n** | **%** |
| --- | --- | --- | --- | --- | --- | --- | --- | --- |
| **Burnout** | mild | 4 | 10.3 |  | **Health status** | excellent | 5 | 12.8 |
|  | moderate | 25 | 64.1 |  |  | good | 24 | 61.5 |
|  | severe | 10 | 25.6 |  |  | bearable | 10 | 25.7 |
| **MBI** | emotional exhaustion (EE) | 30 | 76.9 |  | **Healthcare use frequently** | no | 3 | 7.7 |
|  | depersonalisation (DP) | 16 | 41.0 |  |  | regularly | 7 | 17.9 |
|  | personal accomplishment (PA) | 32 | 82.1 |  |  | once | 9 | 23.1 |
| **MOLBI** | exhaustion | 29 | 74.4 |  |  | several times a year | 9 | 23.1 |
|  | disappointment | 38 | 97.4 |  |  | once a month | 10 | 25.6 |
| **Dysfunctional attitudes** | normal | 2 | 5.1 |  |  | several times a month | 1 | 2.6 |
|  | mild | 33 | 84.6 |  |  | absence due to illness | 10 | 25.6 |
|  | moderate | 4 | 10.3 |  |  | voluntary screening test | 34 | 87.2 |
|  | severe | 0 | 0.0 |  | **Risk factors** | medication usage | 19 | 48.7 |
| **Depression** | normal | 11 | 28.2 |  |  | smoking | 10 | 25.6 |
|  | mild | 27 | 69.2 |  |  | alcohol usage | 0 | 0.0 |
|  | moderate | 1 | 2.6 |  |  | drugs usage | 1 | 2.6 |
|  | severe | 0 | 0.0 |  | **Comorbidity** | diabetes | 2 | 5.1 |
| **Effort- Balance- Reward** | effort | 12 | 3.8 |  |  | hypertension | 11 | 28.2 |
|  | reward | 2 | 5.1 |  |  | cardiovascular disease | 4 | 10.3 |
|  | overcommitment | 1 | 2.6 |  |  | musculosceletal pain | 8 | 20.5 |
| **Social support** | good relationship with colleges | 26 | 66.7 |  |  | history of cancer | 1 | 2.6 |
|  | good relationship with superior | 28 | 71.8 |  |  | psychiatric disease | 3 | 7.7 |
|  | private life (happy) | 36 | 92.3 |  | **Concomitant disease** | irascibility | 8 | 20.5 |
|  | count on colleges help | 34 | 87.2 |  |  | concentration disorder | 6 | 15.4 |
|  | bleak future | 1 | 2.6 |  |  | anxiety | 3 | 7.7 |
|  | statisfied with work | 24 | 61.5 |  |  | emotional stress | 15 | 38.5 |
|  | professional appreciation | 13 | 33.3 |  |  | fatigue | 7 | 17.9 |
|  | human respect | 20 | 51.3 |  |  | mood swings | 9 | 23.1 |
|  | physical exhaustion | 6 | 15.4 |  |  | teeth grinding | 2 | 5.1 |
|  | emotional exhaustion | 3 | 7.7 |  |  | sweating | 10 | 25.6 |
|  | mental exhaustion | 5 | 12.8 |  |  | urge to uritate | 3 | 7.7 |
|  | take part in education | 24 | 61.5 |  |  | headache | 11 | 28.2 |
|  | change career | 16 | 41.0 |  |  | neck, back pain | 19 | 48.7 |
|  | ask for opion | 18 | 46.2 |  |  | sleep disturbance | 8 | 20.5 |
|  | step up possibility | 8 | 20.5 |  |  | digestive disorder | 3 | 7.7 |
|  | complaints without penalty | 25 | 64.1 |  |  | appetite disorder | 1 | 2.6 |
|  | take part in stress relief | 29 | 74.4 |  |  | sexual disorder | 1 | 2.6 |
| **Action reduction of exhaustion** | relaxation | 3 | 7.7 |  |  | skin symptom | 7 | 17.9 |
|  | self-esteem improvement | 5 | 12.8 |  |  | increased smoking | 1 | 2.6 |
|  | other | 4 | 10.3 |  |  |  |  |  |
|  | nothing | 5 | 12.8 |  |  |  |  |  |
|  | conscious lifestyle | 22 | 56.4 |  |  |  |  |  |

Supplementary material

Table S2. Cross-table test (Fisher exact test): Burnout severity and health status. risk factors and diseases of the personell as determined by MBI and BDI tests.

| **Burnout**  (N=39) | **mild** | | **moderate** | | **severe** | | p |
| --- | --- | --- | --- | --- | --- | --- | --- |
| N=4 | 10.3% | N=25 | 64.1% | N=10 | 25.6% |
| **Workplace** | | | | | | | |
| Satellite | 4 | 16.0% | 18 | 72.0% | 3 | 12.0% | 0.167 |
| Center | 0 | 0.0% | 7 | 50.0% | 7 | 50.0% | **0.026*** |
| **Gender** | | | | | | | |
| Male | 0 | 0.0% | 6 | 75.0% | 2 | 25.0% | 0.631 |
| Female | 4 | 12.9 % | 19 | 61.3% | 8 | 25.8% | 0.429 |
| **Age** | | | | | | | |
| 26-35 | 0 | 0.0% | 3 | 42.9% | 4 | 57.1% | 0.301 |
| 36-45 | 1 | 20.0% | 4 | 80.0% | 0 | 0.0% | 0.223 |
| 46-55 | 2 | 14.3% | 7 | 50.0% | 5 | 35.7% | 0.338 |
| 56-62 | 1 | 12.5% | 6 | 75.0% | 1 | 12.5% | 0.145 |
| 62- | 0 | 0.0% | 5 | 100.0% | 0 | 0.0% | 0.087 |
| **Marital status** | | | | | | | |
| single | 0 | 0.0% | 0 | 0.0% | 3 | 100.0% | **0.015*** |
| relationship | 0 | 0.0% | 7 | 70.0% | 3 | 30.0% | 0.069 |
| married | 3 | 15.0% | 16 | 80.0% | 1 | 5.0% | 0.075 |
| divorced/widow | 1 | 16.7% | 2 | 33.3% | 3 | 50.0% | 0.086 |
| **Number of children** | | | | | | | |
| 0no child | 0 | 0.0% | 6 | 54.5% | 5 | 45.5% | **0.018*** |
| 1 child | 0 | 0.0% | 8 | 88.9% | 1 | 11.1% | **0.017*** |
| 2 children | 4 | 28.6% | 6 | 42.9% | 4 | 28.6% | 0.055 |
| 3 or more than 3 | 0 | 0.0% | 5 | 100.0% | 0 | 0.0% | 0.081 |
| **Education** | | | | | | | |
| primary school | 0 | 0.0% | 2 | 100.0% | 0 | 0.0% | 0.341 |
| high school | 3 | 10.3% | 20 | 69.0% | 6 | 20.7% | 0.359 |
| college. university | 1 | 12.5% | 3 | 37.5% | 4 | 50.0% | 0.271 |
| **Type of work** | | | | | | | |
| nurse | 1 | 4.5% | 14 | 63.6% | 7 | 31.8% | 0.313 |
| doctor | 2 | 16.7% | 8 | 63.6% | 2 | 16.7% | 0.283 |
| other heathcare worker | 0 | 0.0% | 0 | 0.0% | 1 | 100.0% | 0.368 |
| **Years spent in healthcare** | | | | | | | |
| -1 | 1 | 33.3% | 1 | 33.3% | 1 | 33.3% | 0.830 |
| 1-5 | 1 | 20.0% | 3 | 60.0% | 1 | 10.0% | 0.867 |
| 6-10 | 0 | 0.0% | 4 | 57.1% | 3 | 30.0% | 0.434 |
| 11-20 | 1 | 16.7% | 3 | 50.0% | 2 | 20.0% | 0.216 |
| 21-30 | 0 | 0.0% | 7 | 77.8% | 2 | 20.0% | 0.051 |
| 31-40 | 1 | 12.5% | 6 | 75.0% | 1 | 10.0% | 0.090 |
| 40- | 0 | 0.0% | 1 | 100.0% | 0 | 0.0% | 0.087 |
| **Work shedule** | | | | | | | |
| one shift | 2 | 8.3% | 18 | 75.0% | 4 | 16.7% | 0.425 |
| two shifts | 2 | 28.6% | 4 | 57.1% | 1 | 14.3% | 0.335 |
| continuous | 0 | 0.0% | 3 | 37.5% | 5 | 62.5% | **0.048*** |
| **Workflow** | | | | | | | |
| inpatient care | 0 | 0.0% | 1 | 50.0% | 1 | 50.0% | 0.167 |
| chronic care | 0 | 0.0% | 10 | 83.3% | 2 | 16.7% | 0.259 |
| outpatient care | 4 | 16.0% | 14 | 56.0% | 7 | 28.0% | 0.064 |
| **Secondary employment** | | | | | | | |
| no | 4 | 11.8% | 23 | 67.6% | 7 | 20.6% | 0.101 |
| yes | 0 | 0.0% | 2 | 40.0% | 3 | 60.0% | 0.074 |
| **Dysfunctional attitudes** | | | | | | | |
| normal | 2 | 100.0% | 0 | 0.0% | 0 | 0.0% | 0.093 |
| mild | 2 | 6.1% | 23 | 69.7% | 8 | 24.2% | **0.017*** |
| moderate | 0 | 0.0% | 2 | 50.0% | 2 | 50.0% | **0.021*** |
| **Depression** | | | | | | | |
| normal | 3 | 27.3% | 8 | 72.7% | 0 | 0.0% | 0.056 |
| mild | 1 | 3.7% | 17 | 63.0% | 9 | 33.3% | **0.012*** |
| moderate | 0 | 0.0% | 0 | 0.0% | 1 | 100.0% | **0.013*** |

*p<0.05 in all cases

Supplementary material

Table S3. Burnout as determined by the SDS questionnaires

| **Burnout**  (N=39) | **mild** | | **moderate** | | **severe** | | p |
| --- | --- | --- | --- | --- | --- | --- | --- |
| N=4 | 10.3% | N=25 | 64.1% | N=10 | 25.6% |
| **Effort- Balance- Reward** | | | | | | | |
| effort | 1 | 8.3% | 6 | 50.0% | 5 | 41.7% | 0.584 |
| reward | 0 | 0.0% | 1 | 50.0% | 1 | 50.0% | 0.252 |
| overcommitment | 0 | 0.0% | 0 | 0.0% | 1 | 100.0% | 0.182 |
| **Social support** | | | | | | | |
| good relationship with colleges | 1 | 3.8% | 20 | 76.9% | 5 | 19.2% | 0.091 |
| good relationship with superior | 2 | 7.1% | 21 | 75.0% | 5 | 17.9% | 0.324 |
| private life (happy) | 3 | 8.3% | 24 | 66.7% | 9 | 25.0% | 0.416 |
| count on colleges help | 3 | 8.8% | 23 | 67.6% | 8 | 23.5% | 0.375 |
| bleak future | 0 | 0.0% | 1 | 100.0% | 0 | 0.0% | 0.344 |
| statisfied with work | 2 | 8.3% | 19 | 79.2% | 3 | 12.5% | 0.705 |
| professional appreciation | 1 | 7.7% | 9 | 69.2% | 3 | 23.1% | 0.083 |
| human respect | 1 | 5.0% | 17 | 85.0% | 2 | 10.0% | 0.051 |
| physical exhaustion | 0 | 0.0% | 3 | 50.0% | 3 | 50.0% | 0.118 |
| emotional exhaustion | 0 | 0.0% | 1 | 33.3% | 2 | 66.7% | **0.048*** |
| mental exhaustion | 0 | 0.0% | 2 | 40.0% | 3 | 60.0% | **0.023*** |
| take part in education | 1 | 4.2% | 14 | 58.3% | 9 | 37.5% | 0.410 |
| change career | 1 | 6.3% | 8 | 50.0% | 7 | 43.8% | 0.743 |
| ask for opion | 1 | 5.6% | 12 | 66.7% | 5 | 27.8% | 0.995 |
| step up possibility | 1 | 12.5% | 3 | 37.5% | 4 | 50.0% | 0.228 |
| complaints without penalty | 4 | 16.0% | 17 | 68.0% | 4 | 16.0% | 0.122 |
| take part in stress relief | 2 | 6.9% | 17 | 58.6% | 10 | 34.5% | 0.907 |
| **Action reduction of exhaustion** | | | | | | | |
| relaxation | 1 | 33.3% | 2 | 66.7% | 0 | 0.0% | 0.291 |
| self-esteem improvement | 1 | 25.0% | 1 | 20.0% | 3 | 60.0% | **0.037*** |
| other | 0 | 0.0% | 3 | 75.0% | 1 | 25.0% | 0.053 |
| nothing | 1 | 25.0% | 1 | 20.0% | 3 | 60.0% | **0.005*** |
| conscious lifestyle | 1 | 25.0% | 18 | 81.8% | 3 | 13.6% | 0.083 |

*p<0.05 in all cases
